# Supplementary material
Source: publisher site journal article supplement (https://www.dovepress.com/article/497624)
Supplement: Supplementary file 1 [file get_supplementary_file.php]

**Supplementary file**

**Questionnaire**

**1. introduction**

Dear doctor,

We want to know your knowledge and attitude about vaccination and your vaccination status. The information you have filled in is of great significance to our research. Please answer every question carefully and do not miss any items. We will keep all the information strictly confidential. This survey is completely voluntary, however, we hope that your answer is true. Thank you very much for your support!

**2. General information**

Gender, date of birth, position of participants (medical students or residents and the year of studies)

**3. Knowledge of vaccination**

**Q1: How strongly do you agree with the following statement: You have enough knowledge about the vaccine.**

(1. strongly disagree, 2. disagree, 3. neutral, 4. agree, 5. strongly agree)

**Q2: How strongly do you agree with the following statement: The current medical course regarding vaccination can meet your needs.**

(1. strongly disagree, 2. disagree, 3. neutral, 4. agree, 5. strongly agree)

**Q3: How strongly do you agree with the following statement: You want to get more knowledge about vaccination.**

(1. strongly disagree, 2. disagree, 3. neutral, 4. agree, 5. strongly agree)

**Q4: What do you need to know about a certain vaccine? (E)**

A. the disease that this vaccine protects against

B. modes and frequency of vaccine administration

C. vaccine formulation, the duration of protection and target group

D. efficacy and safety

E. all of the above

**Q5: What type of clinical research is used to evaluate the vaccine efficacy ? (A)**

A.randomized controlled trial
B.case-control study
C. cross-sectional study
D. longitudinal cohort study

**Q6: What are the indicator of vaccine efficacy? (A)**

A. relative risk of morbidity
B. incidence of the disease
C. total number of the vaccinated population
D. price of the vaccine

**Q7: The higher the efficacy of the vaccine is, . (C)**

A. the smaller the population is vaccinated
B. the lower the frequency of inoculation is
C. the lower the incidence is
D. the shorter the duration of protection is

**Q8: Which of the following aspects should be focused on in the evaluation of vaccine safety? (C)**

1. incidence of disease
   B. age of the inoculator
   C. adverse reactions after vaccination
   D. price of the vaccine

**Q9: What method is commonly used to monitor and report adverse reactions in vaccine safety evaluation? (A)**

A. case report system
B. epidemiologic study
C. randomized controlled trial
D. cross-sectional study

**Q10: What is the most common adverse reaction of vaccination? (C)**

1. fever
   B. headache
   C. local injection site reaction
   D. rash

**Q11: Advantages of live attenuated vaccines do not include: (D)**

1. lower frequency of inoculation
2. good efficacy
3. longer duration of protection
4. no contraindications

**Q12: Which characteristics of immune response is the theoretical basis for vaccination? (B)**

A. recognition of innate immunity for a broad spectrum of pathogens

B. specificity and memory of adaptive immunity

C. the killing effect of T cells against the infected cells

D. phagocytosis and tissue repair function of macrophages

**Q13: Which immunoglobulin can pass through the placenta to fetal? (C)**

1. IgA
2. IgM
3. IgG
4. IgE

**Q14: Which disease is the *Haemophilus influenzae* Vaccine mainly used to prevent? (D)**

1. pneumonia
   B. whooping cough
   C. flu
   D. meningitis

**Q15: Which of the following conditions is most suitable for hepatitis A vaccine? (A)**

A. standard immunizations for children
B. travel to endemic area
C. treatment of hepatitis A
D. pre-school medical examination

**Q16: Which vaccine can prevent liver damage and liver cancer? (B)**

1. hepatitis A vaccine
2. hepatitis B vaccine
3. hepatitis C vaccine
4. hepatitis E vaccine

**Q17: How many doses is the hepatitis B vaccine usually administrated? (C)**

A. one dose
B. two doses
C. three doses
D. four doses

**Q18: When do newborns usually receive the first dose of hepatitis B vaccine after birth? (A)**

A. within 24 hours
B. within 1 month
C. within 6 months
D. within 1 year

**Q19: What is the target group for the rabies vaccine? (D)**

1. young boys and girls
   B. adults
   C. old people
   D. post-exposure prophylaxis (e.g. a dog bite)

**Q20: What is the relationship between smallpox and cowpox? (C)**

A. Smallpox and cowpox are the same disease.
B. Smallpox is caused by the vaccinia virus.
C. Vaccinia is caused by the vaccinia virus, which is a close relative of the smallpox virus.
D. Smallpox and cowpox have no direct relationship.

**Q21: What is the main purpose of varicella vaccination? (B)**

A. relieve the symptoms of chickenpox
B. prevent chickenpox and its complications
C. prevention of other infectious diseases
D. enhance immunity

**Q22: How long is the duration of immunity after varicella vaccination? (C)**

1. Lifelong
2. ten years
3. at least five years
4. two years

**Q23: What is the main target group of the herpes zoster vaccine? (D)**

1. children
2. Adolescents
3. Adults
4. old people

**Q24: What is the main preventive effect of herpes zoster vaccine? (B)**

A. prevent herpes zoster
B. relieve the symptoms of herpes zoster
C. prevent the spread of herpes zoster
D. enhance immunity

**4. Attitude and practice of vaccination and sources of information**

**Q25: Which option best fits your opinion on vaccination?**

A. Vaccination is effective and safe, and I think everyone (except those with contraindications) should be vaccinated.

B. There is too little evidence to confirm the effectiveness of vaccination.

C. There is even too little evidence to confirm the safety of vaccination, and I don't think anyone should be vaccinated.

**Q26: Do you think that vaccination under the national standard immunization program is an effective measure for disease prevention?**

A. Yes, I think it works.

B. I don't think this is necessary, because I will get vaccinated with or without a national program.

C. No, because there is insufficient evidence to prove that vaccination is effective or even that vaccination is safe.

D. No, I don't think the vaccination should be mandatory.

**Q27: Do you know that some vaccines need to be boosted?**

A. Yes, I know and I have inoculated these vaccines correctly.

B. Yes, I know. But I can't make sure I have received all doses of these vaccines.

C. I don't know. This is the first time I've ever heard about it.

D. I don't know, but vaccination is lifelong protection and there is no need to repeat vaccination.

**Q28: Have you ever advised your relatives or friends to be vaccinated?**

A. yes B. no C have never thought about this

**Q29: Vaccines are safe for healthy children.**

A. yes B. no C. don’t know

**Q30: There is no need to get vaccinated for diseases that are already rare right now.**

A. yes B. no C. don’t know

**Q31: People who refuse vaccination will put others at risk.**

A. yes B. no C. don’t know

**Q32: "Natural" immunization after disease is better than vaccine immunization.**

A. yes B. no C. don’t know

**Q33: What influences your opinion about vaccinations the most?（multiple choice）**

A. medical literature and books

B. social medias

C. senior doctors

D. relatives and friends

**5. Self-Reported Vaccination Coverage**

**Q34: Have you received all vaccines according to the national standard immunization schedule for children?**

1. all immunized
2. partly immunized
3. not immunized
4. don’t known

**Q35: Have you ever received the following twelve vaccines other than the national standard immunization? If yes, please tick the box.**

□ Human papillomavirus (HPV) vaccine

□ Influenza vaccine

□ Rubella vaccine

□ *Haemophilus influenzae* vaccine

□ Varicella vaccine

□ Pneumococcal vaccine

□ Rabies vaccine

□ Meningococcal vaccine

□ Measles vaccine

□ Rotavirus vaccine

□ Enterovirus type 71 vaccine

□ COVID-19 vaccine

**Q36: Have you ever received any other vaccine? If any, please fill in the name of the vaccine.**
